# Supplementary material for: Novel coumarin sensitizers based on 2-(thiophen-2-yl)thiazole π-bridge for dye-sensitized solar cells
Source: Royal Society of Chemistry journal article supplement (doi:10.1039/c5pp00216h), 2015-08-25
Supplement: c5pp00216h1.pdf [file c5pp00216h1.pdf]

## Novel coumarin sensitizers based on 2-(thiophen-2-yl)thiazole $\pi$ - bridge for dye-sensitized solar cell

Liang Han, Rui Kang, Xiaoyan Zu, Yanhong Cui and Jianrong Gao\*

(College of Chemical Engineering, Zhejiang University of Technology, Hangzhou, 310032)

**Table SI** Electrochemical properties of coumarin dyes

| Compd        | Experimental <sup>a</sup> (eV) |                               |                   | Calculated <sup>d</sup> (eV) |                  |       |
|--------------|--------------------------------|-------------------------------|-------------------|------------------------------|------------------|-------|
|              | HOMO <sup>a</sup>              | E <sub>0-0</sub> <sup>b</sup> | LUMO <sup>c</sup> | HOMO                         | E <sub>0-0</sub> | LUMO  |
| <b>ZXY-a</b> | -4.82                          | 2.35                          | -2.47             | -5.40                        | 2.47             | -2.93 |
| <b>ZXY-b</b> | -4.74                          | 2.27                          | -2.47             | -5.27                        | 2.41             | -2.86 |

<sup>a</sup> The oxidation potential E<sub>ox</sub> in DMF was determined from cyclic voltammograms and used to describe the ground-state energy HOMO; <sup>b</sup> E<sub>0-0</sub> was calculated from E<sub>0-0</sub> = 1240/  $\lambda_{\text{int}}$  and  $\lambda_{\text{int}}$  was the intersection of the normalized absorption and emission spectra; <sup>c</sup> E<sub>LUMO</sub> was calculated from E<sub>ox</sub>-E<sub>0-0</sub>; <sup>d</sup> Calculated at the B3LYP/6-31G(d) level.
